# Supplementary material for: Chemical profiling of mycosporine‐like amino acids in twenty‐three red algal species
Source: PubMed Central journal article supplement (PMC6492128; doi:10.1111/jpy.12827), 2019-01-31

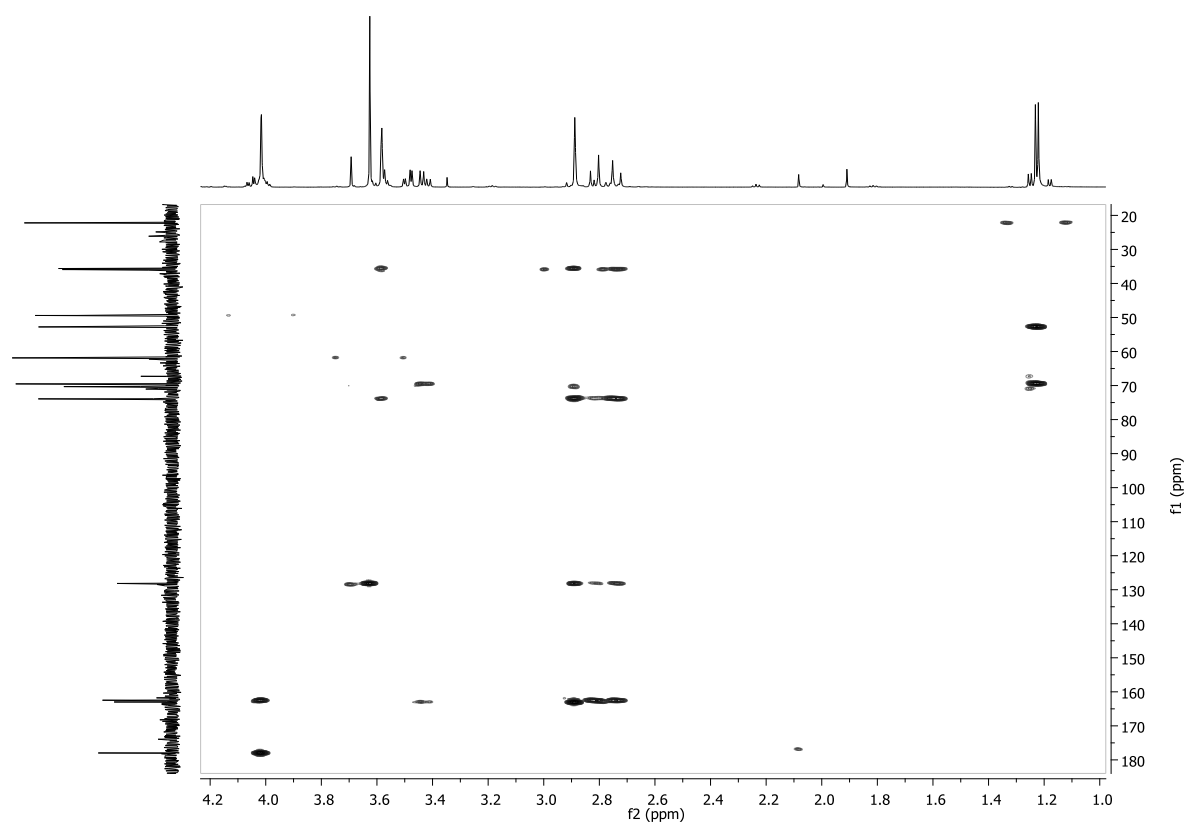

Supplement: JPY-55-393-s006.pdf [file JPY-55-393-s006.pdf]
