# Supplementary material for: Chemical profiling of mycosporine‐like amino acids in twenty‐three red algal species
Source: PubMed Central journal article supplement (PMC6492128; doi:10.1111/jpy.12827), 2019-01-31
Supplement: JPY-55-393-s009.pdf [file JPY-55-393-s009.pdf]

A) Red algae available in large amount (more than 20g)

| <b>Species</b>                 | <b>Family</b>    | <b>Order</b>  | <b>Collection Place, Date</b>                                 |
|--------------------------------|------------------|---------------|---------------------------------------------------------------|
| <i>Pyropia columbina</i>       | Bangiaceae       | Bangiales     | Sydney, Towra Point,<br>Australia, 1995                       |
| <i>Porphyra umbilicalis</i>    | Bangiaceae       | Bangiales     | Helgoland, Harbour,<br>Germany, 1997                          |
| <i>Pyropia plicata</i>         | Bangiaceae       | Bangiales     | Wellington Moa Point,<br>New Zealand, 6/11/2016               |
| <i>Euptilota formosissima</i>  | Callithamniaceae | Ceramiales    | Wellington Moa Point,<br>New Zealand, 1/11/2016;<br>6/11/2016 |
| <i>Ceramium</i> sp.            | Ceramiaceae      | Ceramiales    | Wellington Moa Point,<br>New Zealand, 1/11/2016               |
| <i>Spongoclonium pastorale</i> | Ceramiaceae      | Ceramiales    | Wellington Moa Point,<br>New Zealand, 1/11/2016;<br>6/11/2016 |
| <i>Pterocladia</i> sp.         | Pterocleriaceae  | Gelidiales    | Wellington Princess Bay,<br>New Zealand, July 2016            |
| <i>Agarophyton chilense</i>    | Gracilariaceae   | Gracilariales | Wellington Scorching Bay,<br>New Zealand, May 2016            |

| <i>Schizymenia apoda</i>                                      | Schizymeniaceae | Nestomatales  | Wellington Harbour, New Zealand, 18/11/2016                |
|---------------------------------------------------------------|-----------------|---------------|------------------------------------------------------------|
| <i>Mastocarpus stellatus</i>                                  | Phyllophoraceae | Gigartinales  | Helgoland, Germany, 2006                                   |
| <i>Sarcothalia atropurpurea</i>                               | Gigartinaceae   | Gigartinales  | Wellington Moa Point, New Zealand, August 2016             |
| <i>Gigartina macrocarpa</i>                                   | Gigartinaceae   | Gigartinales  | Wellington Evans Bay, New Zealand, August 2016             |
| <i>Rhodophyllis membranacea</i>                               | Cystocloniaceae | Gigartinales  | Wellington Harbour, New Zealand, 1/11/2016;<br>6/11/2016   |
| <i>Champia novae-zelandiae</i>                                | Champiaceae     | Rhodymeniales | Wellington Moa Point, New Zealand, 6/11/2016               |
| <i>B) Red algae available in small amount (less than 20g)</i> |                 |               |                                                            |
| <b>Species</b>                                                | <b>Family</b>   | <b>Order</b>  | <b>Collection Place, Date</b>                              |
| <i>Craspedocarpus erosus</i>                                  | Cystocloniaceae | Gigartinales  | Wellington Noa Point, New Zealand, 6/11/2016               |
| <i>Blastophyllis calliblepharoides</i>                        | Kallymeniaceae  | Gigartinales  | Wellington Noa Point, New Zealand, 1/11/2016;<br>6/11/2016 |
| <i>Pachymenia laciniata</i>                                   | Halymeniaceae   | Halymeniales  | Wellington Harbour, New Zealand, May 2016                  |
| <i>Pterocladia lucida</i>                                     | Pterocladaceae  | Gelidiales    | Wellington Harbour, New Zealand, 29/09/2016                |

|                                  |                |               |                                                                               |
|----------------------------------|----------------|---------------|-------------------------------------------------------------------------------|
| <i>Corallina officinalis</i>     | Corallinaceae  | Corallinales  | Wellington Harbour, New Zealand, 29/09/2016                                   |
| <i>Gracilariopsis longissima</i> | Gracilariaceae | Gracilariales | Rio San Pedro, Cádiz, Spain, 2017                                             |
| <i>Gracilaria cornea</i>         | Gracilariaceae | Gracilariales | Gran Canaria (Spanish Bank of algae of Las Plamas GC University), Spain, 2017 |
| <i>Hymenena affinis</i>          | Delesseriaceae | Ceramiales    | Wellington Noa Point, New Zealand, 1/11/2016;<br>6/11/2016                    |
| <i>Bostrychia arbuscula</i>      | Rhodomelaceae  | Ceramiales    | Dunedin Harbour, New Zealand, November 2004                                   |
